# Supplementary material for: What has changed HIV and syphilis infection among men who have sex with men (MSM) in Southwest China: a comparison of prevalence and behavioural characteristics (2013–2017)
Source: PubMed Central journal article supplement (PMC6805434; doi:10.1186/s12889-019-7730-0), 2019-10-21
Supplement: 12889_2019_7730_MOESM1_ESM.pdf [file 12889_2019_7730_MOESM1_ESM.pdf]

## The Questionnaire for Men Who Have Sex With Men

Hello! We come from Chongqing CDC or Chongqing Medical University. We are conducting a survey to understand people's knowledge about health and the characteristic of sexual behaviors. Please be assured that this survey is anonymous and we will keep your answer confidential. We hope that your answer is your personal truth. The survey will take up about 10 minutes. At the end of the survey, I can give you some help (for example, you can ask some health questions, We will try to answer). We hope you will support our work. Thank you!

**A01** Survey area: \_\_\_\_\_

**A02** Survey population: MSM

**A03** Zip code of survey area: \_\_\_\_\_

**A03a** The wave of survey: \_\_\_\_\_

**A04** Questionnaire number: \_\_\_\_\_

**A05** Date of survey: \_\_\_\_\_

**A06** Source of sample: \_\_\_\_\_

**A07** Fingerprint number: \_\_\_\_\_

**B01** Birth year: \_\_\_\_\_

**B02** Marital status: 1. unmarried 2. married 3. cohabiting 4. divorced or windowed

**B03** Household registration 1. local 2. other city

**B04** Nation: \_\_\_\_\_

**B05** Local residence time: 1. ( $\leq$  6 months) 2. (7 - 12 months) 3. (1 - 2 year ) 4. (>2 years)

**B06** Education: 1. primary school or below 2.junior middle school 3.high school  
4.university

**B07**Sexual orientation:1.homosexual 2.heterosexual 3.bisexual 4.unknown

**B08** The place to find a male partner: 1.physical location 2.Internet

**B09** Which software you use to seek sexual partners:\_\_\_\_\_

**C01** AIDS is an incurable and serious infectious disease.

1. Yes 2.No 3.Unknown

**C02** MSM is a high-risk factor of HIV infection in China.

1. Yes 2.No 3.Unknown

**C03**Observing the appearance can definitely judge people living with HIV.

1. Yes 2.No 3.Unknown

**C04**STD sufferers have higher odds of HIV infection.

1. Yes 2.No 3.Unknown

**C05**Consistent condom use (CCU) can reduce the risk of HIV transmission.

1. Yes 2.No 3.Unknown

**C06**The usage of drugs increases the risk of HIV infection.

1. Yes 2.No 3.Unknown

**C07**HIV testing should be actively requested after the occurrence of high-risk behaviours.

1. Yes 2.No 3.Unknown

**C08**Anyone who transmits HIV intentionally would undertake legal liability.

1. Yes 2.No 3.Unknown

**C09**You are able to assess HIV-related risks in life.

1. Yes 2.No 3.Unknown

**D00a** How old were you when you first had sex with a man?\_\_\_\_\_

**D00b**What was your sexual role in anal sex?

1. receptive 2. insertive 3. both

**D01**Have you had anal sex with your partner in the last six months?

1. Yes 2. No

**D02** How many times have you had anal sex with your peers in the last week?

\_\_\_\_\_

**D03** Did you use condoms the last time you had anal sex with a homosexual partner in the last six months?

1. Yes 2.No

**D04** How often do you use condoms during anal sex with your homosexual partner in the last six months?

1. Always 2. Sometimes 3. Never

**D05** How many regular sexual partners have you had in the last six months?\_\_\_\_\_

**D06** Did you use condoms when you had anal sex with regular partners in last time in the last six months?

1. Yes 2.No

**D07** How often do you use condoms the last time having anal sex with regular partners in the last six months?

1. Always 2. Sometimes 3. Never

**D08** How many casual sexual partners have you had in the last six months? \_\_\_\_\_

**D09** Did you use condoms the last time you had anal sex with casual partners in the last six months?

1. Yes 2. No

**D10** How often did you use condoms during anal sex with casual partners in the last six months?

1. Always 2. Sometimes 3. Never

**E01** Have you had commercial sex with your peers in the last six months?

1. Yes 2. No

**E02** How often did you use condoms when having commercial sex with your partner in the last six months?

1. Always 2. Sometimes 3. Never

**E03** Did you use condoms last time you had commercial sex with peers in the last six months?

1. Yes 2. No

**F01** Have you had sex with female in the last six months?

1. Yes 2. No

**F02** How often did you use condoms when having sex with females in the last six months?

1. Always 2. Sometimes 3. Never

**F03** Did you use condoms the last time you had sex with females in the last six months?

1. Yes 2.No

**G01a** Have you taken drugs in the last six months?

1. Yes 2.No

**H01** Have you ever been diagnosed with venereal diseases in the last year?

1. Yes 2.No

**H02** Have you received syphilis treatment in the last year?

1. Yes 2.No

**J01** Have you ever been tested for HIV/AIDS in the last year?

1. Yes 2.No

**J02** Do you know the test results?

1. Yes 2.No

**This is the end of the investigation. Thank you for your cooperation!**
